# Supplementary material
Source: MDPI journal article supplement (https://www.mdpi.com/2037-0164/14/4/73)
Supplement: s1 [file s1]

## Supplementary Material

# Molecular Authentication and Phytochemical Evaluation of Indigenous Germplasm of Genus *Physalis* for Sustainable Utilization

Katherine Pere <sup>1</sup>, Kenneth Mburu <sup>2</sup>, Edward K. Muge <sup>1</sup>, John Maina Wagacha <sup>3</sup> and Evans N. Nyaboga <sup>1,\*</sup>

<sup>1</sup> Department of Biochemistry, University of Nairobi, P.O. Box 30197, Nairobi 00100, Kenya; perekatherine@gmail.com (K.P.); mugeek@uonbi.ac.ke (E.K.M.)

<sup>2</sup> Department of Life Sciences, South Eastern Kenya University, P.O. Box 170, Kitui 90200, Kenya; kmburu@seku.ac.ke

<sup>3</sup> Department of Biology, University of Nairobi, P.O. Box 30197, Nairobi 00100, Kenya; maina.wagacha@uonbi.ac.ke

\* Correspondence: nyaboga@uonbi.ac.ke

## Supplementary Tables

Supplementary Table S1: BLASTn analysis results for *Physalis* accessions based on ITS2 and *rbcL* barcode regions

|           | <i>rbcL</i>                 |                                        |         |                      |                          | ITS2                               |                                        |         |                      |                          |
|-----------|-----------------------------|----------------------------------------|---------|----------------------|--------------------------|------------------------------------|----------------------------------------|---------|----------------------|--------------------------|
| Sample ID | Species of Best BLAST match | GenBank accession number (of database) | E value | Percent identity (%) | GenBank accession number | Species of Best BLAST match        | GenBank accession number (of database) | E value | Percent identity (%) | GenBank accession number |
| L1        | <i>Physalis minima</i>      | NC_048515.1                            | 0.0     | 100                  | OQ507152.1               | -                                  | -                                      | -       | -                    | -                        |
| L2        | <i>Physalis minima</i>      | NC_048515.1                            | 0.0     | 100                  | OQ507153.1               | <i>Physalis purpurea</i>           | MH763740.1                             | 0.0     | 92.98                | OQ372021.1               |
| L3        | <i>Physalis minima</i>      | NC_048515.1                            | 0.0     | 99.59                | OQ507154.1               | <i>Physalis purpurea</i>           | MH763740.1                             | 0.0     | 94.06                | OQ372022.1               |
| L4        | <i>Physalis minima</i>      | NC_048515.1                            | 0.0     | 100                  | OQ507155.1               | <i>Physalis peruviana</i>          | AY665914.1                             | 0.0     | 97.41                | OQ372023.1               |
| L5        | <i>Physalis minima</i>      | NC_048515.1                            | 0.0     | 99.86                | OQ507156.1               | <i>Physalis purpurea</i>           | MH763740.1                             | 0.0     | 94.45                | OQ372024.1               |
| L6        | <i>Physalis minima</i>      | NC_048515.1                            | 0.0     | 100                  | OQ507157.1               | <i>Physalis aff. philadelphica</i> | AY665868.1                             | 2e-144  | 91.35                | OQ372025.1               |
| L7        | <i>Physalis minima</i>      | NC_048515.1                            | 0.0     | 100                  | OQ507158.1               | <i>Physalis purpurea</i>           | MH763740.1                             | 1e-148  | 86.00                | OQ372026.1               |
| L8        | <i>Physalis minima</i>      | NC_048515.1                            | 0.0     | 100                  | OQ507159.1               | <i>Physalis purpurea</i>           | MH763740.1                             | 0.0     | 93.07                | OQ372027.1               |
| L9        | <i>Physalis minima</i>      | NC_048515.1                            | 0.0     | 100                  | OQ507160.1               | <i>Physalis purpurea</i>           | MH763740.1                             | 0.0     | 88.96                | OQ372028.1               |
| L10       | <i>Physalis</i>             | NC_048515.1                            | 0.0     | 100                  | OQ507161.1               | <i>Physalis</i>                    | MH763740.1                             | 0.0     | 90.16                | OQ372029.1               |

|  |               |  |  |  |  |                 |   |  |  |  |
|--|---------------|--|--|--|--|-----------------|---|--|--|--|
|  | <i>minima</i> |  |  |  |  | <i>purpurea</i> | 1 |  |  |  |
|--|---------------|--|--|--|--|-----------------|---|--|--|--|

## Supplementary Figures

Supplementary Figure S1: Multiple sequence alignment for *Physalis* accessions ITS2 and *rbcL* gene sequences as well as their reference sequences based on BLASTn analysis (<https://espript.ibcp.fr/ESPrIPT/temp/1818399141/0-0-1680464456-esp.pdf>)

```
1      10      20      30      40      50      60      70
KT178121.1* ATGTCACCAAAACAGAGACTAAAGCAAGTGTGGATTCAAGGCTGGTGTAAAGAGTACAAATTGACTTATTACTC
NC_026570.1* ATGTCACCAAAACAGAGACTAAAGCAAGTGTGGATTCAAGGCTGGTGTAAAGAGTACAAATTGACTTATTACTC
KT178120.1* ATGTCACCAAAACAGAGACTAAAGCAAGTGTGGATTCAAGGCTGGTGTAAAGAGTACAAATTGACTTATTACTC
NC_048515.1* ATGTCACCAAAACAGAGACTAAAGCAAGTGTGGATTCAAGGCTGGTGTAAAGAGTACAAATTGACTTATTACTC
NC_048514.1* ATGTCACCAAAACAGAGACTAAAGCAAGTGTGGATTCAAGGCTGGTGTAAAGAGTACAAATTGACTTATTACTC
NC_070364.1* ATGTCACCAAAACAGAGACTAAAGCAAGTGTGGATTCAAGGCTGGTGTAAAGAGTACAAATTGACTTATTACTC
NC_039458.1* ATGTCACCAAAACAGAGACTAAAGCAAGTGTGGATTCAAGGCTGGTGTAAAGAGTACAAATTGACTTATTACTC
NC_039457.1* ATGTCACCAAAACAGAGACTAAAGCAAGTGTGGATTCAAGGCTGGTGTAAAGAGTACAAATTGACTTATTACTC
OQ507152.1 .....
OQ507153.1 .....
OQ507154.1 .....
OQ507155.1 .....
OQ507156.1 .....
OQ507157.1 .....
OQ507158.1 .....
OQ507159.1 .....
OQ507160.1 .....
OQ507161.1 .....
AY665903.1* .....
AY665868.1* .....
AY665910.1* .....
AY665914.1* .....
AY665879.1* .....
AY665905.1* .....
AY665886.1* .....
MH763728.1* .....
MH763740.1* .....
OQ372021.1 .....
OQ372022.1 .....
OQ372023.1 .....
OQ372024.1 .....
OQ372025.1 .....
OQ372026.1 .....
OQ372027.1 .....
OQ372028.1 .....
OQ372029.1 .....

80      90      100     110     120     130     140     150
KT178121.1* CTGAGTACCAAACTAAGGATACTGATATATTGGCAGCAATCCGAGTAACCTCTCAACCTGGAGTTCCACCCTGAAGAAGC
NC_026570.1* CTGAGTACCAAACTAAGGATACTGATATATTGGCAGCAATCCGAGTAACCTCTCAACCTGGAGTTCCACCCTGAAGAAGC
KT178120.1* CTGAGTACCAAACTAAGGATACTGATATATTGGCAGCAATCCGAGTAACCTCTCAACCTGGAGTTCCACCCTGAAGAAGC
NC_048515.1* CTGAGTACCAAACTAAGGATACTGATATATTGGCAGCAATCCGAGTAACCTCTCAACCTGGAGTTCCACCCTGAAGAAGC
NC_048514.1* CTGAGTACCAAACTAAGGATACTGATATATTGGCAGCAATCCGAGTAACCTCTCAACCTGGAGTTCCACCCTGAAGAAGC
NC_070364.1* CTGAGTACCAAACTAAGGATACTGATATATTGGCAGCAATCCGAGTAACCTCTCAACCTGGAGTTCCACCCTGAAGAAGC
NC_039458.1* CTGAGTACCAAACTAAGGATACTGATATATTGGCAGCAATCCGAGTAACCTCTCAACCTGGAGTTCCACCCTGAAGAAGC
NC_039457.1* CTGAGTACCAAACTAAGGATACTGATATATTGGCAGCAATCCGAGTAACCTCTCAACCTGGAGTTCCACCCTGAAGAAGC
OQ507152.1 .....
OQ507153.1 .....
OQ507154.1 .....
OQ507155.1 .....
OQ507156.1 .....
OQ507157.1 .....
OQ507158.1 .....
OQ507159.1 .....
OQ507160.1 .....
OQ507161.1 .....
AY665903.1* .....
AY665868.1* .....
AY665910.1* .....
AY665914.1* .....
AY665879.1* .....
AY665905.1* .....
AY665886.1* .....
MH763728.1* .....
MH763740.1* .....
OQ372021.1 .....
OQ372022.1 .....
OQ372023.1 .....
OQ372024.1 .....
OQ372025.1 .....
OQ372026.1 .....
OQ372027.1 .....
OQ372028.1 .....
OQ372029.1 .....
```











660 670 680 690 700 710 720 730

KT178121.1\* TTTTGGCGAAGCACTTTTATAAAGCACAGGCTGAAA. CAGGTGAAATCAAAGGGCATTACTTGAATGCTACTGT  
NC\_026570.1\* TTTTGGCGAAGCACTTTTATAAAGCACAGGCTGAAA. CAGGTGAAATCAAAGGGCATTACTTGAATGCTACTGT  
K018120.1\* TTTTGGCGAAGCACTTTTATAAAGCACAGGCTGAAA. CAGGTGAAATCAAAGGGCATTACTTGAATGCTACTGT  
NC\_048145.1\* TTTTGGCGAAGCACTTTTATAAAGCACAGGCTGAAA. CAGGTGAAATCAAAGGGCATTACTTGAATGCTACTGT  
NC\_048514.1\* TTTTGGCGAAGCACTTTTATAAAGCACAGGCTGAAA. CAGGTGAAATCAAAGGGCATTACTTGAATGCTACTGT  
NC\_070364.1\* TTTTGGCGAAGCACTTTTATAAAGCACAGGCTGAAA. CAGGTGAAATCAAAGGGCATTACTTGAATGCTACTGT  
NC\_039458.1\* TTTTGGCGAAGCACTTTTATAAAGCACAGGCTGAAA. CAGGTGAAATCAAAGGGCATTACTTGAATGCTACTGT  
NC\_039457.1\* TTTTGGCGAAGCACTTTTATAAAGCACAGGCTGAAA. CAGGTGAAATCAAAGGGCATTACTTGAATGCTACTGT  
OQ507152.1 TTTTGGCGAAGCACTTTTATAAAGCACAGGCTGAAA. CAGGTGAAATCAAAGGGCATTACTTGAATGCTACTGT  
OQ507153.1 TTTTGGCGAAGCACTTTTATAAAGCACAGGCTGAAA. CAGGTGAAATCAAAGGGCATTACTTGAATGCTACTGT  
OQ507154.1 TTTTGGCGAAGCACTTTTATAAAGCACAGGCTGAAA. CAGGTGAAATCAAAGGGCATTACTTGAATGCTACTGT  
OQ507155.1 TTTTGGCGAAGCACTTTTATAAAGCACAGGCTGAAA. CAGGTGAAATCAAAGGGCATTACTTGAATGCTACTGT  
OQ507156.1 TTTTGGCGAAGCACTTTTATAAAGCACAGGCTGAAA. CAGGTGAAATCAAAGGGCATTACTTGAATGCTACTGT  
OQ507157.1 TTTTGGCGAAGCACTTTTATAAAGCACAGGCTGAAA. CAGGTGAAATCAAAGGGCATTACTTGAATGCTACTGT  
OQ507158.1 TTTTGGCGAAGCACTTTTATAAAGCACAGGCTGAAA. CAGGTGAAATCAAAGGGCATTACTTGAATGCTACTGT  
OQ507159.1 TTTTGGCGAAGCACTTTTATAAAGCACAGGCTGAAA. CAGGTGAAATCAAAGGGCATTACTTGAATGCTACTGT  
OQ507160.1 TTTTGGCGAAGCACTTTTATAAAGCACAGGCTGAAA. CAGGTGAAATCAAAGGGCATTACTTGAATGCTACTGT  
OQ507161.1 TTTTGGCGAAGCACTTTTATAAAGCACAGGCTGAAA. CAGGTGAAATCAAAGGGCATTACTTGAATGCTACTGT  
AY665903.1\* T. GCGCCTTAGGGCGCTC. CGACCCGCGACCCAGGT. CAGGCGGGGATT.  
AY665868.1\* G. GCGCCTTAGGGCGCTC. CGACCCGCGACCCAGGT. CAGGCGGGGATT.  
AY665910.1\* G. GCGCCTTAGGGCGCTC. CGACCCGCGACCCAGGT. CAGGCGGGGATT.  
AY665914.1\* G. GCGCCTTAGGGCGCTC. CGACCCGCGACCCAGGT. CAGGCGGGGATT.  
AY665879.1\* G. GCGCCTTAGGGCGCTC. CGACCCGCGACCCAGGT. CAGGCGGGGATT.  
AY665905.1\* G. GCGCCTTAGGGCGCTC. CGACCCGCGACCCAGGT. CAGGCGGGGATT.  
AY665886.1\* G. GCGCCTTAGGGCGCTC. CGACCCGCGACCCAGGT. CAGGCGGGGATT.  
MH763728.1\* G. GCGCCTTAGGGCGCTC. CGACCCGCGACCCAGGT. CAGGCGGGGATT.  
MH763740.1\* G. GCGCCTTAGGGCGCTC. CGACCCGCGACCCAGGT. CAGGCGGGGATT.  
OQ372021.1 GGTGCGCTTAGGGCGCTT. CGACCCGCGACCCAGGTGAGGTGGAAT.  
OQ372022.1 GCTCTGCTTTGTTGGTTT. CGACAAATGATCTCTCC. CAGGTTTACCTT.  
OQ372023.1 GCGCTTTAGGGCGCT. CGACCCGCGACCCAGGT. GGGATTTTTTCG.  
OQ372024.1 GGTGCGCTTAGGGCGCTT. CGACCCGCGACCCAGGTGAGGTGGAAT.  
OQ372025.1 GCTCTGCTTTGTTGGTTT. CGACAAATGATCTCTCC. CAGGTTTACCTT.  
OQ372026.1 GGTGCGCTTAGGGCGCTT. CGACAAATGATCTCTCC. CAGGTTTACCTT.  
OQ372027.1 GGTGCGCTTAGGGCGCTT. CGACAAATGATCTCTCC. CAGGTTTACCTT.  
OQ372028.1 GGTGCGCTTAGGGCGCTT. CGACAAATGATCTCTCC. CAGGTTTACCTT.  
OQ372029.1 GGTGCGCTTAGGGCGCTT. CGACAAATGATCTCTCC. CAGGTTTACCTT.



Supplementary Figure S2: Multiple sequence alignment for *Physalis* accessions based on ITS2 gene only (<https://esprict.ibcp.fr/ESPript/temp/1397454355/0-0-1688383432-esp.pdf>)

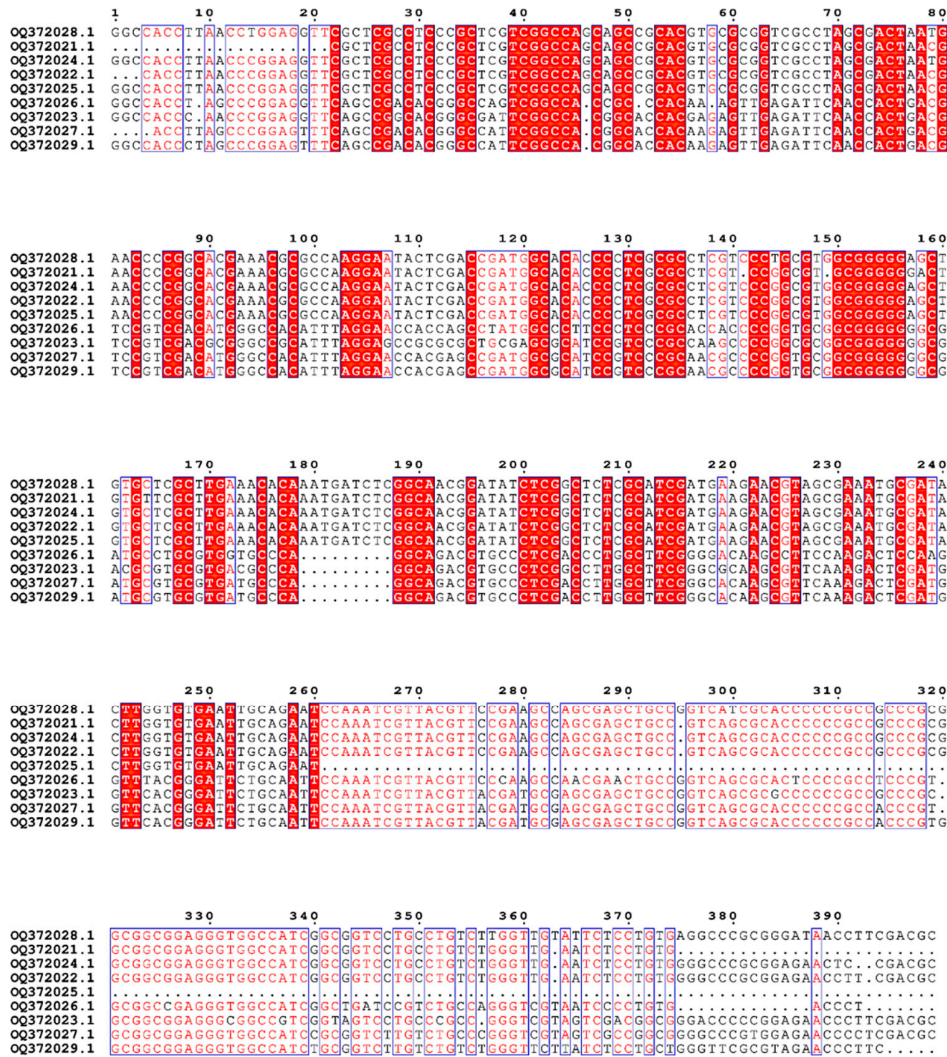

*rbcL* gene only (<https://espript.ibcp.fr/ESPript/temp/1129027434/0-0-1688384286-esp.pdf>)

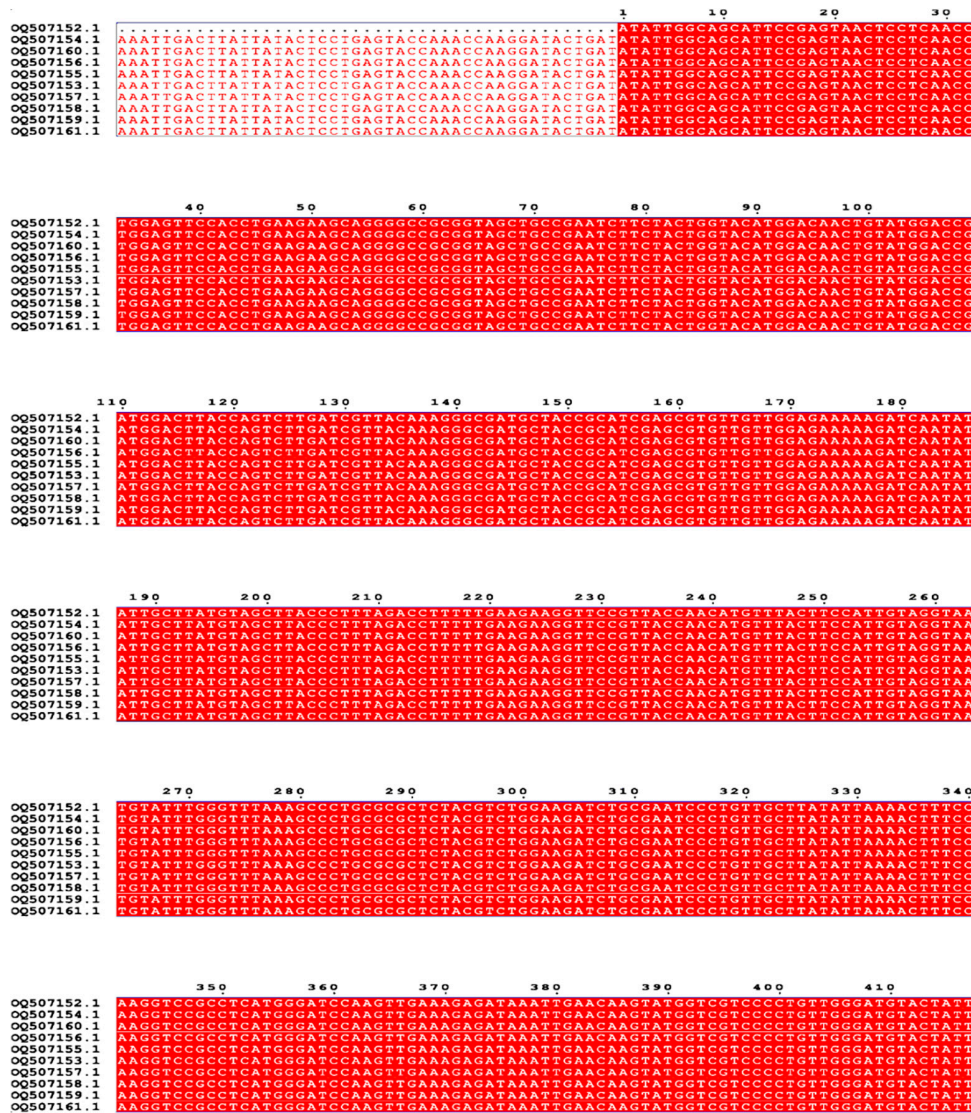

|            | 420                                                       | 430 | 440 | 450 | 460 | 470 | 480 | 490 |
|------------|-----------------------------------------------------------|-----|-----|-----|-----|-----|-----|-----|
| Q0507152.1 | AAACCTAAATTGGGGTTATCTGCTAAAAACTACGGTAGAGCTGTTTATGAATGCTTC |     |     |     |     |     |     |     |
| Q0507154.1 | AAACCTAAATTGGGGTTATCTGCTAAAAACTACGGTAGAGCTGTTTATGAATGCTTC |     |     |     |     |     |     |     |
| Q0507160.1 | AAACCTAAATTGGGGTTATCTGCTAAAAACTACGGTAGAGCTGTTTATGAATGCTTC |     |     |     |     |     |     |     |
| Q0507156.1 | AAACCTAAATTGGGGTTATCTGCTAAAAACTACGGTAGAGCTGTTTATGAATGCTTC |     |     |     |     |     |     |     |
| Q0507155.1 | AAACCTAAATTGGGGTTATCTGCTAAAAACTACGGTAGAGCTGTTTATGAATGCTTC |     |     |     |     |     |     |     |
| Q0507153.1 | AAACCTAAATTGGGGTTATCTGCTAAAAACTACGGTAGAGCTGTTTATGAATGCTTC |     |     |     |     |     |     |     |
| Q0507157.1 | AAACCTAAATTGGGGTTATCTGCTAAAAACTACGGTAGAGCTGTTTATGAATGCTTC |     |     |     |     |     |     |     |
| Q0507158.1 | AAACCTAAATTGGGGTTATCTGCTAAAAACTACGGTAGAGCTGTTTATGAATGCTTC |     |     |     |     |     |     |     |
| Q0507159.1 | AAACCTAAATTGGGGTTATCTGCTAAAAACTACGGTAGAGCTGTTTATGAATGCTTC |     |     |     |     |     |     |     |
| Q0507161.1 | AAACCTAAATTGGGGTTATCTGCTAAAAACTACGGTAGAGCTGTTTATGAATGCTTC |     |     |     |     |     |     |     |

|            | 500                                                   | 510 | 520 | 530 | 540 |
|------------|-------------------------------------------------------|-----|-----|-----|-----|
| Q0507152.1 | CAAAGATGATGAGAACGTGAACCTACAACCATTTATGCGTTGGAGAGATCGTT |     |     |     |     |
| Q0507154.1 | CAAAGATGATGAGAACGTGAACCTACAACCATTTATGCGTTGGAGAGATCGTT |     |     |     |     |
| Q0507160.1 | CAAAGATGATGAGAACGTGAACCTACAACCATTTATGCGTTGGAGAGATCGTT |     |     |     |     |
| Q0507156.1 | CAAAGATGATGAGAACGTGAACCTACAACCATTTATGCGTTGGAGAGATCGTT |     |     |     |     |
| Q0507155.1 | CAAAGATGATGAGAACGTGAACCTACAACCATTTATGCGTTGGAGAGATCGTT |     |     |     |     |
| Q0507153.1 | CAAAGATGATGAGAACGTGAACCTACAACCATTTATGCGTTGGAGAGATCGTT |     |     |     |     |
| Q0507157.1 | CAAAGATGATGAGAACGTGAACCTACAACCATTTATGCGTTGGAGAGATCGTT |     |     |     |     |
| Q0507158.1 | CAAAGATGATGAGAACGTGAACCTACAACCATTTATGCGTTGGAGAGATCGTT |     |     |     |     |
| Q0507159.1 | CAAAGATGATGAGAACGTGAACCTACAACCATTTATGCGTTGGAGAGATCGTT |     |     |     |     |
| Q0507161.1 | CAAAGATGATGAGAACGTGAACCTACAACCATTTATGCGTTGGAGAGATCGTT |     |     |     |     |

Supplementary Figure S4: Heat map representation of the mineral content of *Physalis* accessions.

| Accession Number | [Fe]<br>(ppm) | [Zn]<br>(ppm) | [Ni]<br>(ppm) | [Cu]<br>(ppm) | [Li]<br>(ppm) | [Mn]<br>(ppm) | [Ca]<br>(ppm) | [Na]<br>(ppm) | [K]<br>(ppm) | [Mg]<br>(ppm) |
|------------------|---------------|---------------|---------------|---------------|---------------|---------------|---------------|---------------|--------------|---------------|
| OQ507152.1       |               |               |               |               |               |               |               |               |              |               |
| OQ372021.1       |               |               |               |               |               |               |               |               |              |               |
| OQ372022.1       |               |               |               |               |               |               |               |               |              |               |
| OQ372023.1       |               |               |               |               |               |               |               |               |              |               |
| OQ372024.1       |               |               |               |               |               |               |               |               |              |               |
| OQ372025.1       |               |               |               |               |               |               |               |               |              |               |
| OQ372026.1       |               |               |               |               |               |               |               |               |              |               |
| OQ372028.1       |               |               |               |               |               |               |               |               |              |               |
| OQ372029.1       |               |               |               |               |               |               |               |               |              |               |

Green color represents specific high mineral concentration for the *Physalis* accession while yellow represents specific moderate mineral concentration and red represents specific low mineral concentration.



Supplementary Figure S5: Heat map for the polyphenol content distribution of *Physalis* accessions

| Accession Number | TPC (mg GAE /g DW) | TTC (mg Tannic acid/g DW) | TFC (mg Rutin/g DW) |
|------------------|--------------------|---------------------------|---------------------|
| OQ507152.1       | Yellow             | Green                     | Green               |
| OQ372021.1       | Orange             | Light Green               | Yellow              |
| OQ372022.1       | Red                | Light Green               | Yellow              |
| OQ372023.1       | Red                | Light Green               | Orange              |
| OQ372024.1       | Red                | Dark Green                | Light Green         |
| OQ372025.1       | Yellow             | Orange                    | Yellow              |
| OQ372026.1       | Orange             | Orange                    | Orange              |
| OQ372027.1       | Yellow             | Orange                    | Light Green         |
| OQ372028.1       | Orange             | Red                       | Green               |
| OQ372029.1       | Yellow             | Yellow                    | Green               |

Green color represents specific high polyphenol concentration for the *Physalis* accession while yellow represents specific moderate polyphenol concentration and red represents specific low polyphenol concentration

Supplementary Figure S6: Heat map for the radical scavenging activity of *Physalis* accessions

| Accession Number | DPPH RSA % | HRSA % |
|------------------|------------|--------|
| OQ507152.1       |            |        |
| OQ372021.1       |            |        |
| OQ372022.1       |            |        |
| OQ372023.1       |            |        |
| OQ372024.1       |            |        |
| OQ372025.1       |            |        |
| OQ372026.1       |            |        |
| OQ372027.1       |            |        |
| OQ372028.1       |            |        |
| OQ372029.1       |            |        |

Green color represents specific high radical scavenging activity for the *Physalis* accession while yellow represents specific moderate radical scavenging activity and red represents specific low radical scavenging activity.
